# Supplementary material
Source: publisher site journal article supplement (https://www.dovepress.com/article/417821)
Supplement: Supplementary file 1 [file get_supplementary_file.php]

# Appendix A

Summary of patient baseline characteristics.

|  | **Total** | **Aqueous**  **Samples** | **Vitreous Samples** |
| --- | --- | --- | --- |
| **Number of patients,** n | 25 | 15 | 20 |
| **Female Sex**, n (%) | 14 (56%) | 10 (67%) | 10 (50%) |
| **Age** (years), mean (SD) | 63.0 ± 13.0 | 63.3 ± 14.5 | 62.3 ± 12.4 |
| **Diagnosis,** n (%) |  |  |  |
| Rhegmatogenous retinal detachment | 5 (20%) | 3 (20%) | 5 (25%) |
| Tractional retinal detachment | 4 (16%) | 2 (13%) | 3 (15%) |
| Macular hole | 4 (16%) | 4 (27%) | 4 (20%) |
| Epiretinal membrane | 4 (16%) | 0 (0%) | 4 (20%) |
| Cataract | 4 (16%) | 4 (27%) | 0 (0%) |
| Proliferative vitreoretinopathy | 1 (4%) | 1 (7%) | 1 (5%) |
| Vitreous hemorrhage | 1 (4%) | 0 (0%) | 1 (5%) |
| Posterior vitreous detachment | 1 (4%) | 0 (0%) | 1 (5%) |
| Retained lens | 1 (4%) | 1 (7%) | 0 (0%) |
| **Surgery Type,** n (%) |  |  |  |
| PPV | 21 (84%) | 11 (73%) | 20 (100%) |
| PPV only | 12 (48%) | 6 (40%) | 12 (60%) |
| Combined PPV + CE/IOL | 8 (32%) | 4 (27%) | 7 (35%) |
| Combined PPV + SB | 1 (4%) | 1 (7%) | 1 (5%) |
| CE/IOL | 4 (16%) | 4 (27%) | 0 (0%) |
| **Pseudophakic Lens Status,** n (%) | 6 (24%) | 4 (27%) | 6 (30%) |

CE/IOL, cataract extraction with intraocular lens implant; n, number; PPV, pars plana vitrectomy; SB, scleral buckle; SD, standard deviation; n, number.

# Appendix B

Variability of Replicates for Cytokine Biomarkers in Aqueous and Vitreous Humor Samples

| **Analyte** | **Replicate Analysis Time-Points** | **Aqueous Humor** | | | | **Vitreous Humor** | | | |
| --- | --- | --- | --- | --- | --- | --- | --- | --- | --- |
| **ICC** | **Lower 95% CI** | **Upper 95% CI** | **Paired t-test** | **ICC** | **Lower 95% CI** | **Upper 95% CI** | **Paired t-test** |
| Basic FGF | Time-point 1 | 0.977 | 0.939 | 0.991 | 0.593 | 0.842 | 0.655 | 0.932 | 0.749 |
| Time-point 2 | 0.978 | 0.942 | 0.992 | 0.891 | 0.755 | 0.954 |
| Time-point 3 | 0.986 | 0.921 | 0.998 | 0.936 | 0.874 | 0.968 |
| Time-point 4 | 0.994 | 0.978 | 0.998 | 0.841 | 0.683 | 0.924 |
| Eotaxin | Time-point 1 | 0.997 | 0.993 | 0.999 | 0.114 | 0.975 | 0.940 | 0.990 | 0.008 |
| Time-point 2 | 0.995 | 0.987 | 0.998 | 0.976 | 0.943 | 0.990 |
| Time-point 3 | 0.999 | 0.993 | 1.000 | 0.939 | 0.879 | 0.969 |
| Time-point 4 | 0.998 | 0.995 | 1.000 | 0.975 | 0.946 | 0.988 |
| G-CSF | Time-point 1 | 0.996 | 0.988 | 0.998 | 0.022 | 0.980 | 0.951 | 0.992 | 0.440 |
| Time-point 2 | 0.990 | 0.974 | 0.996 | 0.982 | 0.957 | 0.993 |
| Time-point 3 | 0.998 | 0.986 | 1.000 | 0.942 | 0.886 | 0.971 |
| Time-point 4 | 0.994 | 0.979 | 0.998 | 0.921 | 0.836 | 0.963 |
| GM-CSF | Time-point 1 | 0.977 | 0.939 | 0.991 | 0.050 | 0.906 | 0.787 | 0.961 | 0.023 |
| Time-point 2 | 0.975 | 0.934 | 0.991 | 0.919 | 0.814 | 0.966 |
| Time-point 3 | 0.983 | 0.901 | 0.998 | 0.894 | 0.796 | 0.947 |
| Time-point 4 | 0.993 | 0.976 | 0.998 | 0.673 | 0.404 | 0.836 |
| IFN-γ | Time-point 1 | 0.996 | 0.989 | 0.998 | 0.121 | 0.994 | 0.986 | 0.998 | 0.359 |
| Time-point 2 | 0.984 | 0.957 | 0.994 | 0.993 | 0.982 | 0.997 |
| Time-point 3 | 0.995 | 0.969 | 0.999 | 0.888 | 0.784 | 0.943 |
| Time-point 4 | 0.998 | 0.994 | 1.000 | 0.989 | 0.976 | 0.995 |
| IL-1β | Time-point 1 | 0.911 | 0.776 | 0.966 | 0.847 | 0.902 | 0.778 | 0.959 | 0.346 |
| Time-point 2 | 0.944 | 0.856 | 0.979 | 0.956 | 0.896 | 0.982 |
| Time-point 3 | 0.996 | 0.973 | 0.999 | 0.822 | 0.670 | 0.909 |
| Time-point 4 | 0.996 | 0.987 | 0.999 | 0.847 | 0.696 | 0.927 |
| IL-1ra | Time-point 1 | 0.998 | 0.995 | 0.999 | 0.591 | 0.999 | 0.998 | 1.000 | 0.558 |
| Time-point 2 | 0.996 | 0.990 | 0.999 | 0.998 | 0.994 | 0.999 |
| Time-point 3 | 0.748 | 0.072 | 0.959 | 0.931 | 0.864 | 0.965 |
| Time-point 4 | 0.995 | 0.983 | 0.999 | 0.990 | 0.977 | 0.995 |
| IL-2 | Time-point 1 | 0.684 | 0.329 | 0.872 | 0.357 | 0.271 | -0.164 | 0.620 | 0.366 |
| Time-point 2 | 0.606 | 0.204 | 0.836 | 0.482 | 0.083 | 0.750 |
| Time-point 3 | 0.937 | 0.673 | 0.991 | 0.262 | -0.087 | 0.554 |
| Time-point 4 | 0.995 | 0.981 | 0.999 | -0.047 | -0.409 | 0.331 |
| IL-4 | Time-point 1 | 0.981 | 0.949 | 0.993 | 0.227 | 0.973 | 0.935 | 0.989 | 0.295 |
| Time-point 2 | 0.982 | 0.953 | 0.993 | 0.977 | 0.945 | 0.990 |
| Time-point 3 | 0.999 | 0.996 | 1.000 | 0.906 | 0.818 | 0.953 |
| Time-point 4 | 0.994 | 0.980 | 0.998 | 0.971 | 0.937 | 0.986 |
| IL-5 | Time-point 1 | 0.980 | 0.946 | 0.993 | 0.006 | 0.942 | 0.866 | 0.976 | 0.440 |
| Time-point 2 | 0.977 | 0.940 | 0.992 | 0.978 | 0.947 | 0.991 |
| Time-point 3 | 0.994 | 0.964 | 0.999 | 0.876 | 0.762 | 0.937 |
| Time-point 4 | 0.995 | 0.983 | 0.999 | 0.887 | 0.770 | 0.947 |
| IL-6 | Time-point 1 | 0.999 | 0.996 | 0.999 | 0.253 | 0.997 | 0.992 | 0.999 | 0.413 |
| Time-point 2 | 1.000 | 1.000 | 1.000 | 0.998 | 0.996 | 0.999 |
| Time-point 3 | 0.999 | 0.994 | 1.000 | 0.951 | 0.902 | 0.975 |
| Time-point 4 | 1.000 | 0.999 | 1.000 | 0.993 | 0.985 | 0.997 |
| IL-7 | Time-point 1 | 0.905 | 0.762 | 0.964 | 0.790 | 0.948 | 0.879 | 0.979 | <0.001 |
| Time-point 2 | 0.933 | 0.830 | 0.975 | 0.926 | 0.831 | 0.969 |
| Time-point 3 | 0.865 | 0.396 | 0.980 | 0.797 | 0.627 | 0.895 |
| Time-point 4 | 0.993 | 0.976 | 0.998 | 0.777 | 0.571 | 0.891 |
| IL-8 | Time-point 1 | 0.998 | 0.994 | 0.999 | 0.010 | 0.998 | 0.995 | 0.999 | 0.336 |
| Time-point 2 | 0.997 | 0.992 | 0.999 | 0.998 | 0.996 | 0.999 |
| Time-point 3 | 0.998 | 0.986 | 1.000 | 0.974 | 0.947 | 0.987 |
| Time-point 4 | 0.996 | 0.986 | 0.999 | 0.988 | 0.975 | 0.995 |
| IL-9 | Time-point 1 | 0.991 | 0.976 | 0.997 | 0.497 | 0.949 | 0.882 | 0.979 | 0.833 |
| Time-point 2 | 0.994 | 0.984 | 0.998 | 0.946 | 0.874 | 0.978 |
| Time-point 3 | 0.998 | 0.986 | 1.000 | 0.978 | 0.955 | 0.989 |
| Time-point 4 | 0.994 | 0.979 | 0.998 | 0.876 | 0.748 | 0.941 |
| IL-10 | Time-point 1 | 0.866 | 0.675 | 0.949 | 0.341 | 0.529 | 0.145 | 0.777 | 0.552 |
| Time-point 2 | 0.951 | 0.872 | 0.982 | 0.633 | 0.294 | 0.832 |
| Time-point 3 | 0.939 | 0.683 | 0.991 | 0.526 | 0.226 | 0.736 |
| Time-point 4 | 0.989 | 0.961 | 0.997 | -0.084 | -0.440 | 0.297 |
| IL-12(p70) | Time-point 1 | 0.762 | 0.467 | 0.906 | 0.516 | 0.529 | 0.145 | 0.777 | 0.344 |
| Time-point 2 | 0.511 | 0.068 | 0.789 | 0.557 | 0.184 | 0.792 |
| Time-point 3 | 0.950 | 0.732 | 0.993 | 0.405 | 0.075 | 0.657 |
| Time-point 4 | 0.994 | 0.978 | 0.998 | 0.189 | -0.194 | 0.524 |
| IL-13 | Time-point 1 | 0.673 | 0.310 | 0.867 | 0.928 | 0.368 | -0.057 | 0.682 | 0.353 |
| Time-point 2 | 0.912 | 0.778 | 0.967 | 0.444 | 0.034 | 0.728 |
| Time-point 3 | 0.934 | 0.660 | 0.990 | 0.622 | 0.357 | 0.795 |
| Time-point 4 | 0.993 | 0.975 | 0.998 | -0.331 | -0.624 | 0.047 |
| IL-15 | Time-point 1 | 0.977 | 0.940 | 0.992 | 0.928 | 0.982 | 0.957 | 0.993 | 0.677 |
| Time-point 2 | 0.988 | 0.969 | 0.996 | 0.990 | 0.977 | 0.996 |
| Time-point 3 | 0.982 | 0.895 | 0.997 | 0.890 | 0.788 | 0.945 |
| Time-point 4 | 0.981 | 0.936 | 0.995 | 0.875 | 0.746 | 0.941 |
| IL-17 | Time-point 1 | 0.929 | 0.820 | 0.974 | 0.745 | 0.684 | 0.374 | 0.858 | 0.292 |
| Time-point 2 | 0.958 | 0.890 | 0.984 | 0.024 | -0.396 | 0.439 |
| Time-point 3 | 0.971 | 0.839 | 0.996 | 0.549 | 0.256 | 0.750 |
| Time-point 4 | 0.991 | 0.969 | 0.998 | 0.357 | -0.014 | 0.643 |
| IP-10 | Time-point 1 | 0.999 | 0.999 | 1.000 | 0.341 | 0.984 | 0.962 | 0.994 | 0.552 |
| Time-point 2 | 0.999 | 0.997 | 1.000 | 0.994 | 0.986 | 0.998 |
| Time-point 3 | 0.999 | 0.991 | 1.000 | 0.909 | 0.824 | 0.955 |
| Time-point 4 | 1.000 | 1.000 | 1.000 | 0.983 | 0.964 | 0.992 |
| MCP-1 | Time-point 1 | 0.999 | 0.996 | 1.000 | 0.277 | 0.998 | 0.994 | 0.999 | 0.346 |
| Time-point 2 | 1.000 | 0.999 | 1.000 | 0.998 | 0.995 | 0.999 |
| Time-point 3 | 0.998 | 0.986 | 1.000 | 0.844 | 0.706 | 0.920 |
| Time-point 4 | 0.999 | 0.998 | 1.000 | 0.994 | 0.987 | 0.997 |
| MIP-1α | Time-point 1 | 0.998 | 0.994 | 0.999 | 0.459 | 0.989 | 0.974 | 0.996 | 0.768 |
| Time-point 2 | 0.997 | 0.991 | 0.999 | 0.996 | 0.990 | 0.998 |
| Time-point 3 | 0.998 | 0.989 | 1.000 | 0.986 | 0.973 | 0.993 |
| Time-point 4 | 0.997 | 0.988 | 0.999 | 0.988 | 0.974 | 0.995 |
| MIP-1β | Time-point 1 | 0.998 | 0.995 | 0.999 | 0.213 | 0.997 | 0.994 | 0.999 | 0.848 |
| Time-point 2 | 0.995 | 0.987 | 0.998 | 0.990 | 0.976 | 0.996 |
| Time-point 3 | 0.999 | 0.993 | 1.000 | 0.975 | 0.949 | 0.988 |
| Time-point 4 | 0.999 | 0.996 | 1.000 | 0.989 | 0.976 | 0.995 |
| PDGF-BB | Time-point 1 | 0.954 | 0.881 | 0.983 | 0.002 | 0.618 | 0.272 | 0.824 | <0.001 |
| Time-point 2 | 0.948 | 0.867 | 0.981 | 0.733 | 0.457 | 0.882 |
| Time-point 3 | 0.971 | 0.840 | 0.996 | 0.574 | 0.290 | 0.766 |
| Time-point 4 | 0.993 | 0.976 | 0.998 | 0.617 | 0.320 | 0.804 |
| RANTES | Time-point 1 | 1.000 | 0.999 | 1.000 | 0.676 | 0.942 | 0.864 | 0.976 | 0.191 |
| Time-point 2 | 1.000 | 0.999 | 1.000 | 0.962 | 0.911 | 0.984 |
| Time-point 3 | 0.996 | 0.977 | 0.999 | 0.999 | 0.997 | 0.999 |
| Time-point 4 | 0.998 | 0.993 | 0.999 | 0.930 | 0.855 | 0.967 |
| TNF-α | Time-point 1 | 0.994 | 0.985 | 0.998 | 0.857 | 0.942 | 0.864 | 0.976 | 0.092 |
| Time-point 2 | 0.986 | 0.962 | 0.995 | 0.835 | 0.642 | 0.929 |
| Time-point 3 | 0.991 | 0.945 | 0.999 | 0.921 | 0.846 | 0.961 |
| Time-point 4 | 0.994 | 0.979 | 0.998 | 0.571 | 0.256 | 0.778 |
| VEGF | Time-point 1 | 0.986 | 0.963 | 0.995 | 0.750 | 0.949 | 0.880 | 0.979 | 0.257 |
| Time-point 2 | 0.955 | 0.884 | 0.983 | 0.919 | 0.814 | 0.966 |
| Time-point 3 | 0.918 | 0.593 | 0.988 | 0.953 | 0.907 | 0.977 |
| Time-point 4 | 0.961 | 0.869 | 0.989 | 0.854 | 0.709 | 0.931 |

**Abbreviations**: ICC, intraclass correlation coefficient; CI, confidence interval; FGF, fibroblast growth factor; G-CSF, granulocyte colony-stimulating factor; GM-CSF, granulocyte-macrophage colony-stimulating factor; IFN-γ, interferon gamma; IL, interleukin; MCP, monocyte chemoattractant protein; MIP-1α, macrophage inflammatory protein-1 alpha; MIP-1β, macrophage inflammatory protein-1 beta; PDGF, platelet-derived growth factor; RANTES, regulated upon activation, normal T cell expressed and presumably secreted; TNF, tumor necrosis factor; VEGF, vascular endothelial growth factor.
